# Supplementary material
Source: publisher figshare collection journal article supplement (https://acs.figshare.com/ndownloader/files/5397113)
Supplement: Supplementary file 1 [file 5397113]

Supporting Information for  
**Modified Separator Using Thin Carbon Layer Obtained from its Cathode for Advanced Lithium Sulfur Batteries**

Naiqiang Liu,<sup>†</sup> Bicheng Huang,<sup>†</sup> Weikun Wang,<sup>‡</sup> Hongyuan Shao,<sup>†</sup> Chengming Li,<sup>†</sup> Hao Zhang,<sup>‡</sup> Anbang Wang,<sup>‡</sup> Keguo Yuan,<sup>‡</sup> and Yaqin Huang<sup>\*,†</sup>

<sup>†</sup>State Key Laboratory of Chemical Resource Engineering, The Key Laboratory of Beijing City on Preparation and Processing of Novel Polymer Materials, Beijing University of Chemical Technology, 15 Beisanhuan East Road, Beijing, 100029, China.

<sup>‡</sup>Military Power Sources Research and Development Center, Research Institute of Chemical Defense, 35 Huayuan North Road, Beijing 100191, China

E-mail: huangyaqin9@sina.cn .

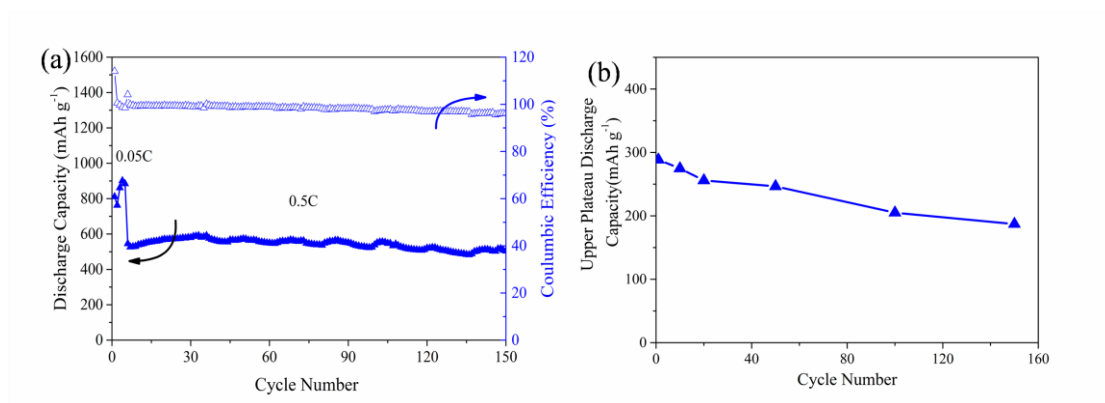

Fig. S1. (a) Long cycle performance of Li-S cells with IM modified separator using PVDF binder at the rate of 0.5C. (b) Upper plateau discharge capacities of batteries with IM modified separator using PVDF binder at various cycles.

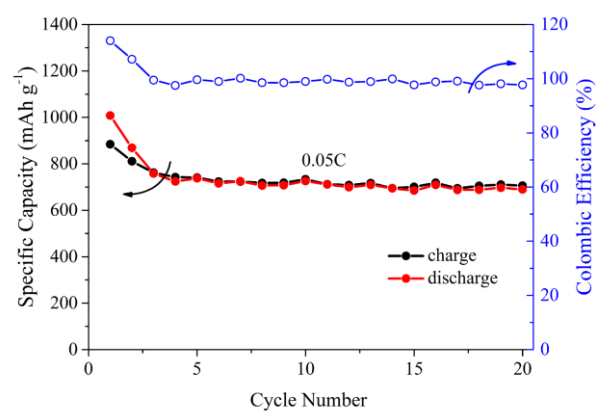

Fig. s2. Cycling performance of Li-S cells with IM modified separator at high sulfur loadings of 5 mg cm<sup>-2</sup>.
